# Supplementary material for: General practitioners’ management of depression symptoms in Somali refugee and Norwegian patients: a film vignette experiment
Source: HighWire-hosted journal article supplement (doi:10.1136/bmjopen-2021-055261), 2021-12-01
Supplement: bmjopen-2021-055261supp001_data_supplement.pdf [file bmjopen-2021-055261supp001_data_supplement.pdf]

**Figure S1.** CONSORT flow diagram of participant flow in the four groups.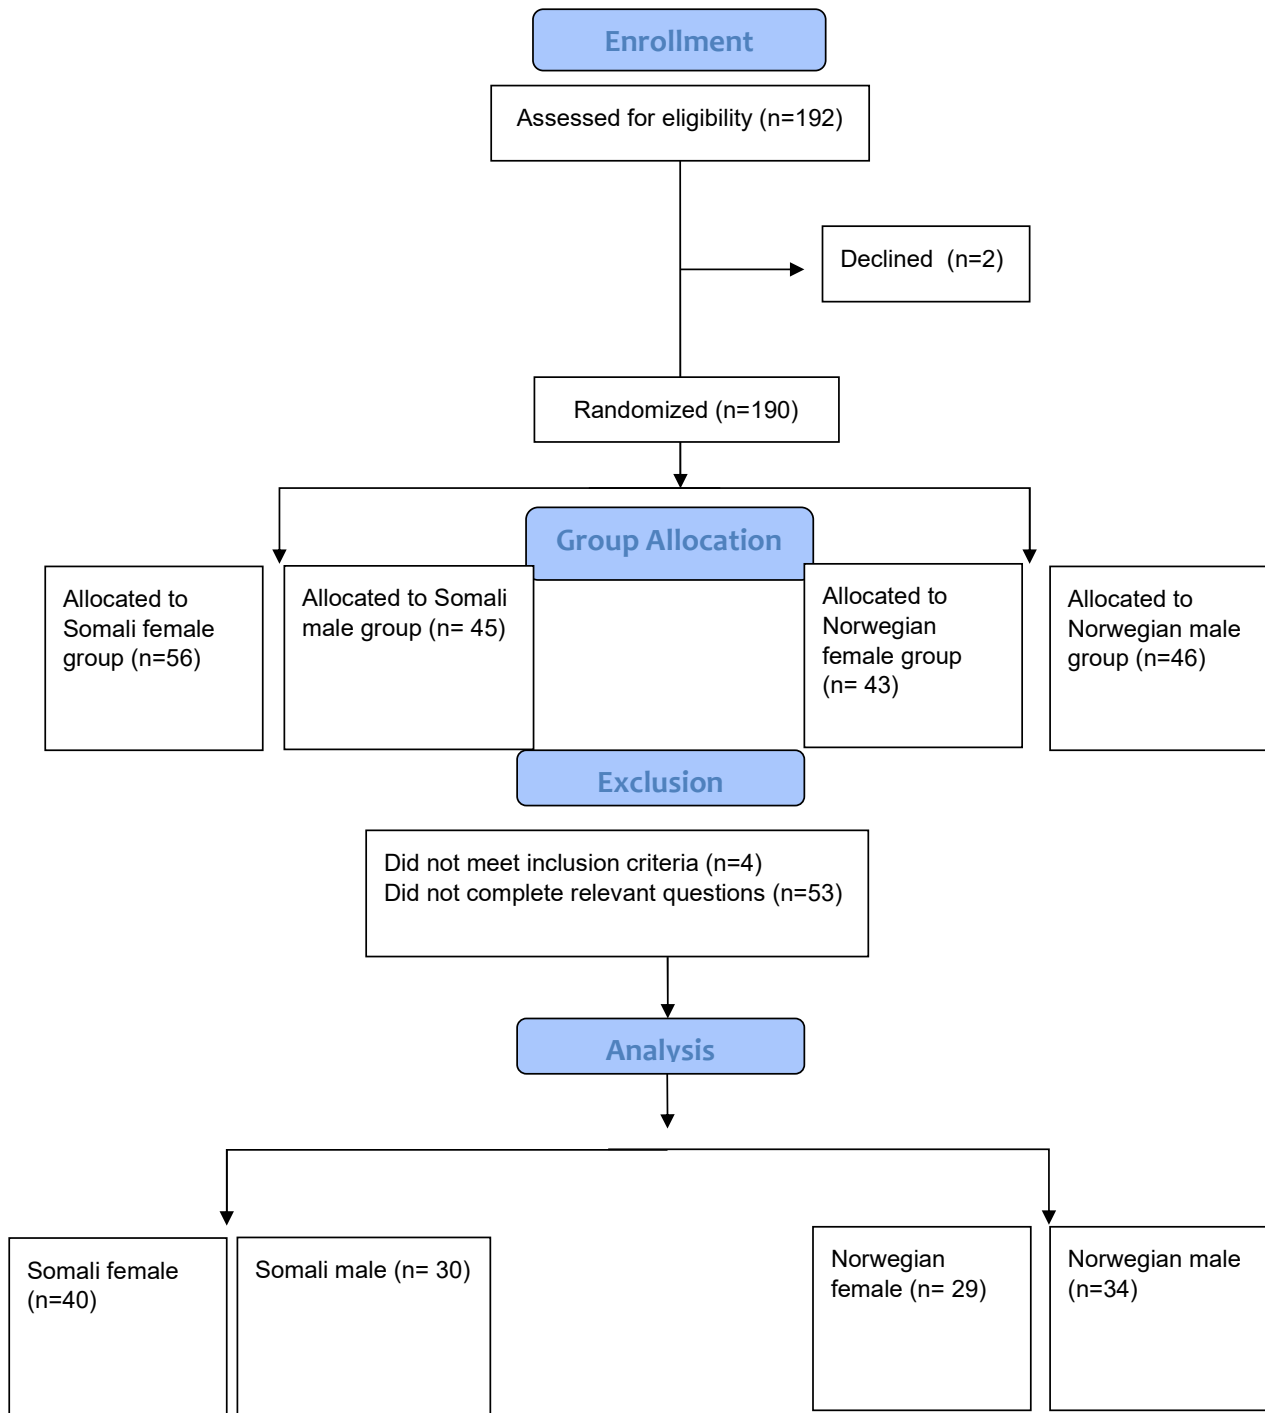

**Figure S2.** Vignette characters, female Norwegian (top left), female Somali (top right), male Norwegian (bottom left), male Somali (bottom right).

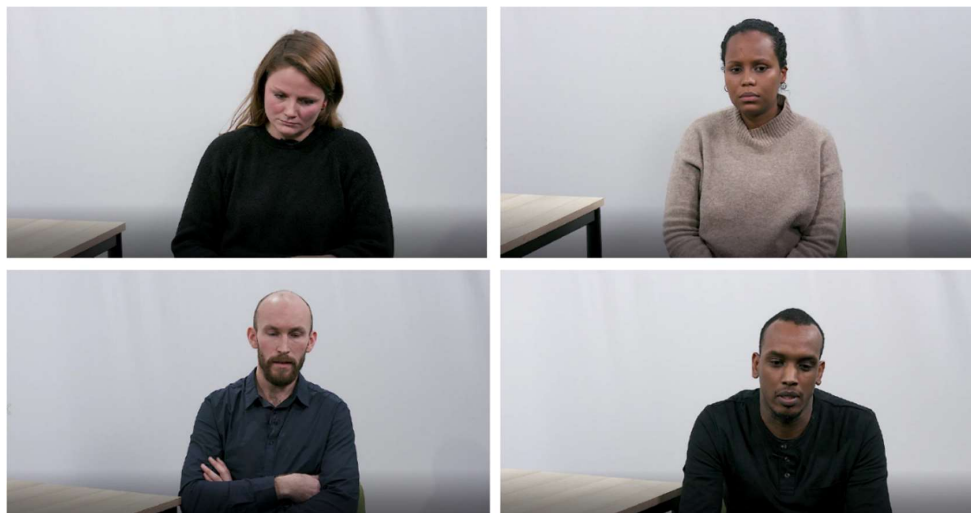

**Box S1.** Information given to GP participants before the online survey.

English translation

Imagine that you are a GP and have just arrived at the practice where you work. Your first patient is already waiting for you. You are currently substituting for a colleague of yours and have never met this patient. You have a few minutes to look through the patient's medical notes. You find the following information:

Name: Mari Berg/Emil Olsen/Hodan Osman/Abdi Warsame  
Background: born and raised in Norway/refugee from Somalia  
Time spent in Norway: NA/3 years  
Age: 31  
Married: Yes  
Children: 2

Reason for today's consultation: Headache. The patient has previously been examined for headaches and no somatic cause was found.

You will now see a short film clip (4-5min) of a consultation with this patient. Then you will be asked to answer questions regarding how you would have assessed and treated this patient.

**Table S1.** Participant characteristics (N=133) by vignette character, including significance test for Pearson's Chi<sup>2</sup> comparison of groups.

| Participant characteristics                                | Vignette character (N%) |              |              |               | p     |
|------------------------------------------------------------|-------------------------|--------------|--------------|---------------|-------|
|                                                            | Mari<br>N=29            | Emil<br>N=34 | Abdi<br>N=30 | Hodan<br>N=40 |       |
| Gender                                                     |                         |              |              |               | 0.864 |
| Male                                                       | 10 (34.5%)              | 10 (28.6%)   | 9 (30.0%)    | 10 (25.0%)    |       |
| Female                                                     | 19 (65.5%)              | 24 (70.6%)   | 21 (70.0%)   | 30 (75.0%)    |       |
| Age                                                        |                         |              |              |               | 0.308 |
| 20-29                                                      | 0 (0.0%)                | 2 (5.9%)     | 3 (10.0%)    | 4 (10.0%)     |       |
| 30-39                                                      | 16 (55.2%)              | 16 (45.1%)   | 17 (56.7%)   | 17 (42.5%)    |       |
| 40-49                                                      | 5 (17.2%)               | 9 (26.5%)    | 4 (13.3%)    | 11 (27.5%)    |       |
| 50-59                                                      | 2 (6.9%)                | 1 (2.9%)     | 2 (6.7%)     | 3 (7.5%)      |       |
| 60+                                                        | 6 (20.7%)               | 6 (17.6%)    | 4 (13.3%)    | 5 (12.5%)     |       |
| Region of origin                                           |                         |              |              |               | 0.714 |
| Scandinavia                                                | 25 (86.2%)              | 32 (94.1%)   | 28 (93.3%)   | 34 (85.0%)    |       |
| Eastern Europe & Rest of Europe                            | 2 (6.9%)                | 1 (2.9%)     | 0 (0.0%)     | 2 (5.0%)      |       |
| Africa & Asia                                              | 2 (6.9%)                | 1 (2.9%)     | 2 (6.7%)     | 4 (10.0%)     |       |
| Years of work experience                                   |                         |              |              |               | 0.466 |
| <10                                                        | 17 (58.6%)              | 21 (61.8%)   | 22 (73.3%)   | 25 (62.5%)    |       |
| 11-20                                                      | 5 (17.2%)               | 6 (17.6%)    | 2 (6.7%)     | 8 (20.0%)     |       |
| 21-30                                                      | 1 (3.5%)                | 4 (11.8%)    | 2 (6.7%)     | 5 (12.5%)     |       |
| 30+                                                        | 6 (20.7%)               | 3 (8.8%)     | 4 (13.3%)    | 2 (5.0%)      |       |
| Region where education was undertaken                      |                         |              |              |               | 0.308 |
| Scandinavia                                                | 20 (69.0%)              | 25 (73.5%)   | 27 (90.0%)   | 29 (72.5%)    |       |
| Eastern Europe                                             | 6 (20.7%)               | 7 (20.6%)    | 3 (10.0%)    | 10 (25.0%)    |       |
| Rest of Europe & Africa                                    | 3 (10.3%)               | 2 (5.9%)     | 0 (0.0%)     | 1 (2.5%)      |       |
| Distance from specialist health services (i.e. centrality) |                         |              |              |               | 0.471 |
| <30min                                                     | 17 (58.6%)              | 24 (70.6%)   | 23 (76.7%)   | 31 (77.5%)    |       |
| 30-60                                                      | 9 (31.0%)               | 5 (14.7%)    | 4 (13.3%)    | 4 (10.0%)     |       |
| 60+                                                        | 2 (6.9%)                | 3 (8.8%)     | 2 (6.7%)     | 2 (5.0%)      |       |
| I don't know                                               | 0 (0.0%)                | 0 (0.0%)     | 1 (3.3%)     | 0 (0.0%)      |       |
| I work at a specialist health service                      | 1 (3.5%)                | 2 (5.9%)     | 0 (0.0%)     | 3 (7.5%)      |       |
| Course in migration and health taken during education*     |                         |              |              |               | 0.097 |
| Yes                                                        | 12 (41.4%)              | 18 (52.9%)   | 15 (50.0%)   | 8 (20.0%)     |       |
| No                                                         | 12 (41.4%)              | 10 (29.4%)   | 10 (33.3%)   | 20 (50.0%)    |       |
| I don't remember                                           | 5 (17.2%)               | 6 (17.6%)    | 5 (16.7%)    | 12 (30.0%)    |       |
| Course in migration and health taken after education*      |                         |              |              |               | 0.136 |
| Yes                                                        | 9 (31.0%)               | 8 (23.5%)    | 6 (20.0%)    | 13 (32.5%)    |       |
| No                                                         | 20 (69.0%)              | 23 (67.6%)   | 24 (80.0%)   | 22 (55.0%)    |       |

| Participant characteristics            | Vignette character (N%) |              |              |               | p     |
|----------------------------------------|-------------------------|--------------|--------------|---------------|-------|
|                                        | Mari<br>N=29            | Emil<br>N=34 | Abdi<br>N=30 | Hodan<br>N=40 |       |
| I don't remember                       | 0 (0.0%)                | 3 (8.8%)     | 0 (0.0%)     | 5 (12.5%)     |       |
| Need a course in migration and health* | 15 (51.7%)              | 27 (79.4%)   | 21 (70.0%)   | 26 (65.0%)    | 0.132 |

\*asked after presentation of the film vignette. NB categories with few participants were combined. Categories with 0 participants were dropped. This included 'Latin America', 'North America', and 'Oceania' for region of origin, 'Latin America', 'North America', 'Asia', and 'Oceania' for region of education, and '>50 years' for work experience.

**Table S2.** Table of frequentist 2x2 ANOVAs and interactions of participants' certainty about clinical decisions by sex and background of vignette character. Mean refers to GPs' average certainty score (0=not certain at all, 7=very certain).

| Clinical decision     | DF | Mean(SD) | Sum of Squares | Mean Squares | F Value | p-value |
|-----------------------|----|----------|----------------|--------------|---------|---------|
| Diagnosis 1           |    |          |                |              |         |         |
| <b>Sex</b>            | 1  |          | 0.16           | 0.1573       | 0.079   | 0.779   |
| Female                |    | 5.3(1.3) |                |              |         |         |
| Male                  |    | 5.3(1.5) |                |              |         |         |
| <b>Background</b>     | 1  |          | 0.09           | 0.0931       | 0.047   | 0.829   |
| Somali                |    | 5.3(1.4) |                |              |         |         |
| Norwegian             |    | 5.3(1.4) |                |              |         |         |
| <b>Sex*Background</b> | 1  |          | 0.05           | 0.0517       | 0.026   | 0.872   |
| Diagnosis 2           |    |          |                |              |         |         |
| <b>Sex</b>            | 1  |          | 0.02           | 0.0165       | 0.008   | 0.928   |
| Female                |    | 5.1(1.5) |                |              |         |         |
| Male                  |    | 5.1(1.4) |                |              |         |         |
| <b>Background</b>     | 1  |          | 0.01           | 0.0068       | 0.003   | 0.954   |
| Somali                |    | 5.1(1.4) |                |              |         |         |
| Norwegian             |    | 5.1(1.4) |                |              |         |         |
| <b>Sex*Background</b> | 1  |          | 0.02           | 0.0221       | 0.011   | 0.917   |
| Diagnosis 3           |    |          |                |              |         |         |
| <b>Sex</b>            | 1  |          | 0.08           | 0.085        | 0.030   | 0.863   |
| Female                |    | 4.6(1.7) |                |              |         |         |
| Male                  |    | 4.7(1.7) |                |              |         |         |
| <b>Background</b>     | 1  |          | 2.15           | 2.152        | 0.766   | 0.384   |
| Somali                |    | 4.5(1.6) |                |              |         |         |
| Norwegian             |    | 4.8(1.8) |                |              |         |         |
| <b>Sex*Background</b> | 1  |          | 5.25           | 5.249        | 1.869   | 0.175   |
| Assessment 1          |    |          |                |              |         |         |
| <b>Sex</b>            | 1  |          | 0.07           | 0.0667       | 0.043   | 0.837   |
| Female                |    | 6.2(1.4) |                |              |         |         |
| Male                  |    | 6.2(1.1) |                |              |         |         |
| <b>Background</b>     | 1  |          | 0.19           | 0.1938       | 0.124   | 0.726   |
| Somali                |    | 6.2(1.3) |                |              |         |         |
| Norwegian             |    | 6.2(1.2) |                |              |         |         |
| <b>Sex*Background</b> | 1  |          | 0.67           | 0.6673       | 0.426   | 0.515   |
| Assessment 2          |    |          |                |              |         |         |
| <b>Sex</b>            | 1  |          | 0.25           | 0.2532       | 0.171   | 0.680   |
| Female                |    | 5.9(1.3) |                |              |         |         |

|                       |           |          |      |        |       |       |
|-----------------------|-----------|----------|------|--------|-------|-------|
|                       | Male      | 5.9(1.1) |      |        |       |       |
| <b>Background</b>     | 1         |          | 1.87 | 1.8653 | 1.258 | 0.264 |
|                       | Somali    | 6.0(1.1) |      |        |       |       |
|                       | Norwegian | 5.8(1.3) |      |        |       |       |
| <b>Sex*Background</b> | 1         |          | 0.03 | 0.0260 | 0.018 | 0.895 |
| <b>Assessment 3</b>   |           |          |      |        |       |       |
| <b>Sex</b>            | 1         |          | 1.45 | 1.4529 | 0.683 | 0.411 |
|                       | Female    | 5.5(1.2) |      |        |       |       |
|                       | Male      | 5.3(1.7) |      |        |       |       |
| <b>Background</b>     | 1         |          | 0.47 | 0.4704 | 0.221 | 0.639 |
|                       | Somali    | 5.3(1.5) |      |        |       |       |
|                       | Norwegian | 5.4(1.4) |      |        |       |       |
| <b>Sex*Background</b> | 1         |          | 2.80 | 2.7992 | 1.315 | 0.254 |
| <b>Treatment 1</b>    |           |          |      |        |       |       |
| <b>Sex</b>            | 1         |          | 0.54 | 0.536  | 0.424 | 0.516 |
|                       | Female    | 6.2(1.1) |      |        |       |       |
|                       | Male      | 6.1(1.2) |      |        |       |       |
| <b>Background</b>     | 1         |          | 5.45 | 5.452  | 4.318 | 0.040 |
|                       | Somali    | 5.9(1.3) |      |        |       |       |
|                       | Norwegian | 6.3(0.9) |      |        |       |       |
| <b>Sex*Background</b> | 1         |          | 0.44 | 0.443  | 0.351 | 0.555 |
| <b>Treatment 2</b>    |           |          |      |        |       |       |
| <b>Sex</b>            | 1         |          | 1.66 | 1.659  | 0.929 | 0.337 |
|                       | Female    | 5.3(1.4) |      |        |       |       |
|                       | Male      | 5.5(1.3) |      |        |       |       |
| <b>Background</b>     | 1         |          | 0.01 | 0.009  | 0.005 | 0.945 |
|                       | Somali    | 5.4(1.4) |      |        |       |       |
|                       | Norwegian | 5.4(1.3) |      |        |       |       |
| <b>Sex*Background</b> | 1         |          | 4.25 | 4.248  | 2.379 | 0.126 |
| <b>Treatment 3</b>    |           |          |      |        |       |       |
| <b>Sex</b>            | 1         |          | 4.21 | 4.209  | 2.040 | 0.158 |
|                       | Female    | 4.3(1.5) |      |        |       |       |
|                       | Male      | 4.8(1.5) |      |        |       |       |
| <b>Background</b>     | 1         |          | 4.99 | 4.992  | 2.420 | 0.124 |
|                       | Somali    | 4.8(1.5) |      |        |       |       |
|                       | Norwegian | 4.4(1.5) |      |        |       |       |
| <b>Sex*Background</b> | 1         |          | 4.26 | 4.257  | 2.064 | 0.155 |
